# Supplementary material for: Safety and Survival Outcomes of Liver Resection following Triple Combination Conversion Therapy for Initially Unresectable Hepatocellular Carcinoma
Source: MDPI journal article supplement (doi:10.3390/cancers15245878), 2023-12-17

Supplementary figure S1. The standardized mean difference before and after propensity score analysis.

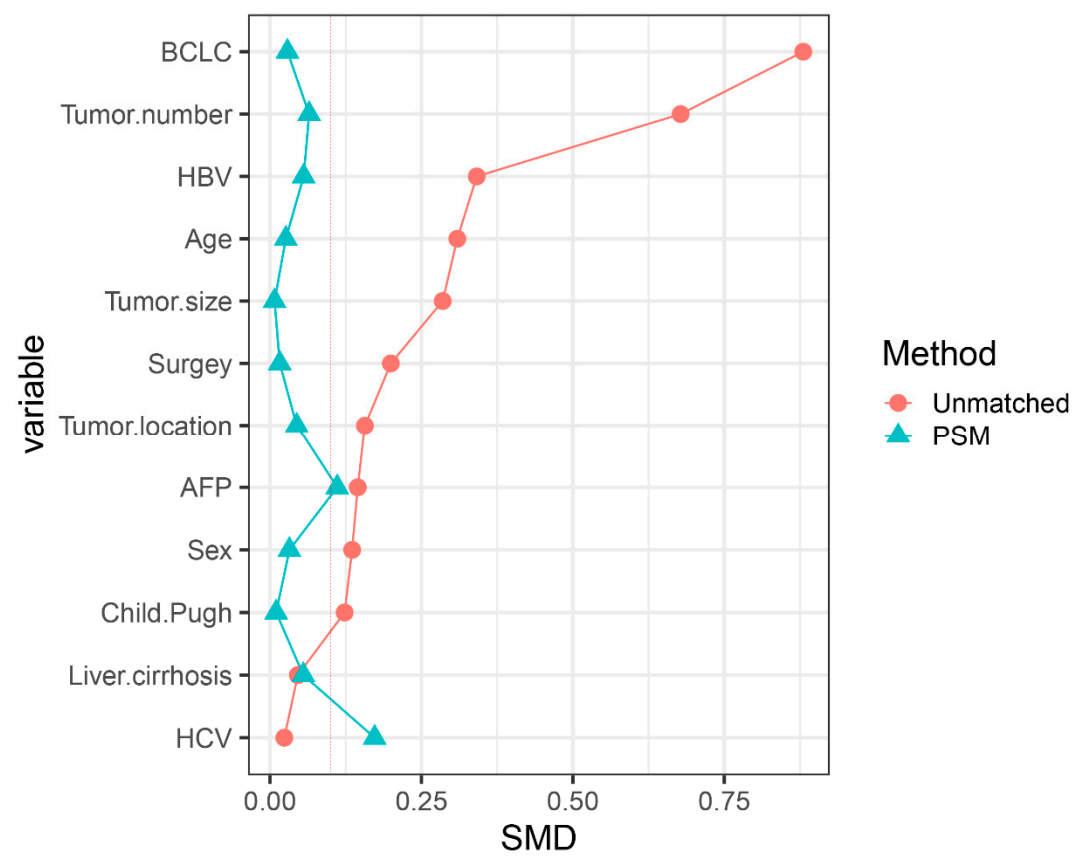

Supplement: s1 [file s1]
